# Supplementary material for: Solvent-controlled assembling by hydrogen bridges and halogen-halogen interactions of novel organotin oxo clustersElectronic supplementary information (ESI) available: Synthesis and analytical data for PhI2SnCH2SnI2Ph. See http://www.rsc.org/suppdata/cc/b1/b111337b/
Source: Royal Society of Chemistry journal article supplement (doi:10.1039/b111337b), 2002-03-21
Supplement: b111337b.doc [file b111337b.doc]

**Supplementary Material (ESI) for Chemical Communications**

**This journal is © The Royal Society of Chemistry 2002**

**Synthesis of bis(diiodophenylstannyl)methane, (PhI2Sn)2CH2.**

To an ice-cooled magnetically stirred solution of bis(triphenylstannyl)methane (30.01 g, 42 mmol) in dichloromethane (300 mL) was added iodine (42.67 g, 168 mmol) in small portions over a period of 8 h. The ice bath was removed and stirring of the reaction mixture was continued over night. The solvent and the iodobenzene were removed *in vacuo* to give quantitatively (PhI2Sn)2CH2 as yellow oil.

1H NMR (400.1 MHz, CDCl3)  (ppm) 2.77 (s, 2H, 2*J*(1H–119Sn) = 65 Hz, CH2), 7.43–7.69. complex pattern, 10H, Haryl).

13C NMR (100.6 MHz, CDCl3)  (ppm) 12.15 (CH2, 1*J*(13C–117/119Sn) = 269/280 Hz), 129.2 (C*m*, 3*J*(13C–119/117Sn) = 80/85 Hz), 131 .4 (C*p*, 4*J*(13C–119/117Sn) = 17 Hz), 134.5 (C*o*, 2*J*(13C–119Sn) = 67 Hz), 135.5 (C*i*).

119Sn NMR (149.2 MHz, CDCl3)  (ppm) 241 (2*J*(119Sn–117Sn) = 274 Hz).

Anal. Found: C, 17.3; H, 1.3. Calc. for (PhI2Sn)2CH2: C, 17.1; H, 1.3 %.
